# Supplementary material
Source: MDPI journal article supplement (https://www.mdpi.com/2075-163X/9/3/177)
Supplement: s1 [file s1]

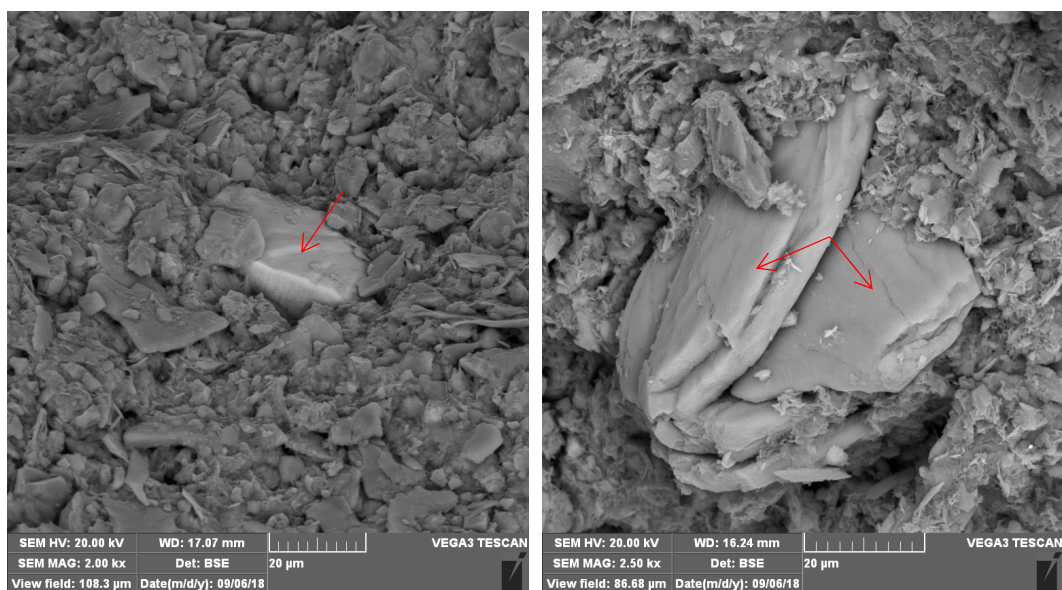

Figure S1. The occurrence of zircon and carbonate fluorapatite indicated by arrows in the left and right figure, respectively.
